# Supplementary material for: Enhancing the stability of CsPbX3 (X = Br, I) through combination with Y-zeolites for WLED application
Source: Royal Society of Chemistry journal article supplement (doi:10.1039/d1dt03409j), 2021-01-01
Supplement: d1dt03409j1.pdf [file d1dt03409j1.pdf]

## ***Enhancing the Stability of CsPbX<sub>3</sub> (X = Br, I) Through Combination with Y-zeolites for WLED Application***

Dayu Huang,<sup>a,c,#</sup> Yue Liu,<sup>a,b,#</sup> Qiuyun Ouyang,<sup>c,\*</sup> Hongzhou Lian<sup>a,\*</sup> and Jun Lin<sup>a,b,d\*</sup>

<sup>a</sup>State Key Laboratory of Rare Earth Resource Utilization, Changchun Institute of Applied Chemistry, Chinese Academy of Sciences, Changchun 130022, P. R. China

<sup>b</sup>University of Science and Technology of China, Hefei 230026, P. R. China

<sup>c</sup>Key Laboratory of In-Fiber Integrated Optics, Ministry Education of China, and College of Physics and Optoelectronic Engineering, Harbin Engineering University, Harbin 150001, China

<sup>d</sup>School of Applied Physics and Materials, Wuyi University, Jiangmen, Guangdong, 529020, P. R. China.

#Dayu Huang and Yue Liu contributed equally

## Table of Contents

**Figure S1.** Photographs showing the transformation process of Cs<sub>4</sub>PbCl<sub>6</sub> NCs to CsPbBr<sub>3</sub> and CsPbI<sub>3</sub> NCs.

**Figure S2.** (a-b) HRTEM of a single CsPbBr<sub>3</sub> and CsPbI<sub>3</sub> NCs. (c-d) Size distribution histogram of CsPbBr<sub>3</sub> and CsPbI<sub>3</sub> NCs.

**Figure S3.** XRD pattern of prepared NCs with ZnBr<sub>2</sub> solution in excess.

**Figure S4.** PL emission spectra of CsPbBr<sub>3</sub> NCs through ZnBr<sub>2</sub> and SnBr<sub>2</sub> solution triggered transformed.

**Figure S5.** Photographs showing the stability of CsPbBr<sub>3</sub> NCs obtained through (a) 100 μL and (b) 1500 μL ZnBr<sub>2</sub> and SnBr<sub>2</sub> solution triggered transformed.

**Figure S6.** Remnant PL of CsPbBr<sub>3</sub> NCs and CsPbBr<sub>3</sub>@zeolite in different time.

**Table S1.** Formation energy of Cs<sub>4</sub>PbCl<sub>6</sub>, CsPbBr<sub>3</sub>, CsPbI<sub>3</sub>, CsCl, ZnCl<sub>2</sub>, ZnBr<sub>2</sub>, and ZnI<sub>2</sub>.

**Table S2.** Comparison of specific surface area and pore size of mesoporous silicon before and after loading samples.

**Table S3.** Summary of emitting materials and PeLED Performances.

**Video S1.** More intuitive transformation process.

## Computation methods

Spin-polarized GGA calculations have been performed based on density functional theory (DFT), as implemented in the Vienna ab initio Simulation Package (VASP). The electrons of Cs(5s<sup>2</sup>5p<sup>6</sup>6s<sup>1</sup>), Pb(5p<sup>10</sup>6s<sup>2</sup>6p<sup>2</sup>), Zn(3d<sup>10</sup>4s<sup>2</sup>), Br(4p<sup>5</sup>4s<sup>2</sup>), I(5p<sup>5</sup>5s<sup>2</sup>), and Cl(3s<sup>2</sup>3p<sup>5</sup>) were treated as valence electrons. The geometry optimizations were performed until the total energies and the forces on the atoms converged to 10<sup>-4</sup> eV and 0.02 eV Å<sup>-1</sup>, respectively. A 2 × 2 × 2 k (Cs<sub>4</sub>PbCl<sub>6</sub>), 11 × 11 × 11 k (CsCl), 11 × 11 × 11 k (CsPbBr<sub>3</sub>), 11 × 11 × 11 k (CsPbI<sub>3</sub>), 2 × 2 × 2 k (ZnBr<sub>2</sub>), 6 × 6 × 6 k (ZnCl<sub>2</sub>), 2 × 2 × 2 k (ZnI<sub>2</sub>), -point grid was used, and the cutoff energy for the plane wave basis was set to 400 eV. Effects of spin-orbit coupling were included throughout the calculations.

The Perdew-Burke-Ernzerhof (PBE) function within the generalized gradient approximation was used for the exchange-correlation energy. The formation energy of the reaction process is expressed as,

$$E_f = 2E(\text{Cs}_4\text{PbCl}_6) - 2E(\text{CsPbBr}_3) - 6E(\text{CsCl}) - 3E(\text{ZnCl}_2) + 3E(\text{ZnBr}_2) \quad (1)$$

$$E_f = 2E(\text{Cs}_4\text{PbCl}_6) - 2E(\text{CsPbI}_3) - 6E(\text{CsCl}) - 3E(\text{ZnCl}_2) + 3E(\text{ZnI}_2) \quad (2)$$

where,  $E(\text{Cs}_4\text{PbCl}_6)$ ,  $E(\text{CsPbBr}_3)$ ,  $E(\text{CsPbI}_3)$ ,  $E(\text{CsCl})$ ,  $E(\text{ZnCl}_2)$ ,  $E(\text{ZnBr}_2)$  and  $E(\text{ZnI}_2)$  are the energy of pristine  $\text{Cs}_4\text{PbCl}_6$ ,  $\text{CsPbBr}_3$ ,  $\text{CsPbI}_3$ ,  $\text{CsCl}$ ,  $\text{ZnCl}_2$ ,  $\text{ZnBr}_2$ , and  $\text{ZnI}_2$ .

**Table 1** | Formation energy of  $\text{Cs}_4\text{PbCl}_6$ ,  $\text{CsPbBr}_3$ ,  $\text{CsPbI}_3$ ,  $\text{CsCl}$ ,  $\text{ZnCl}_2$ ,  $\text{ZnBr}_2$ , and  $\text{ZnI}_2$

| Structures                 | $E_f$ (eV) | PBE (eV)   | Number of units |
|----------------------------|------------|------------|-----------------|
| $\text{Cs}_4\text{PbCl}_6$ | -37.66562  | -225.99372 | 6               |
| $\text{CsCl}$              | -6.5438814 | -6.5438814 | 1               |
| $\text{CsPbBr}_3$          | -15.898891 | -15.898891 | 1               |
| $\text{CsPbI}_3$           | -14.065143 | -14.065143 | 1               |
| $\text{ZnBr}_2$            | -7.1238653 | -227.96369 | 32              |
| $\text{ZnCl}_2$            | -8.2212935 | -32.885174 | 4               |
| $\text{ZnI}_2$             | -5.9942619 | -191.81638 | 32              |

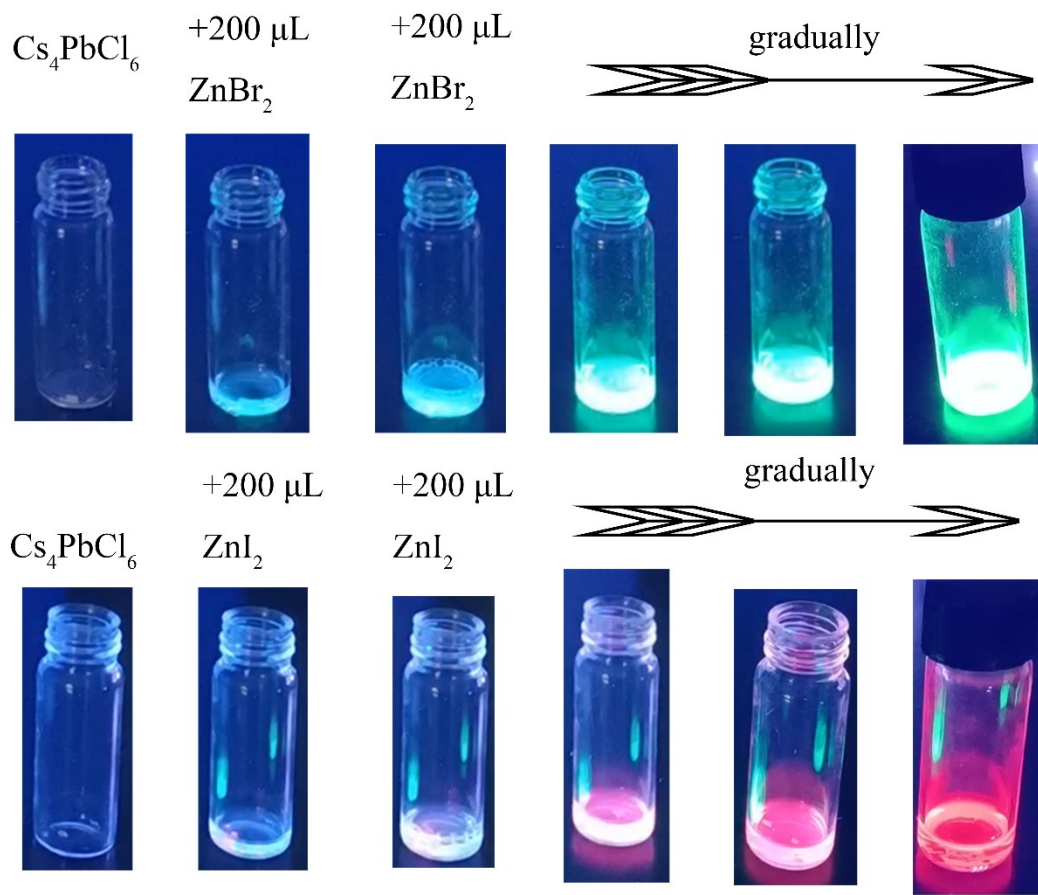

Figure S1. Photographs showing the transformation process of  $\text{Cs}_4\text{PbCl}_6$  NCs to  $\text{CsPbBr}_3$  and  $\text{CsPbI}_3$  NCs.

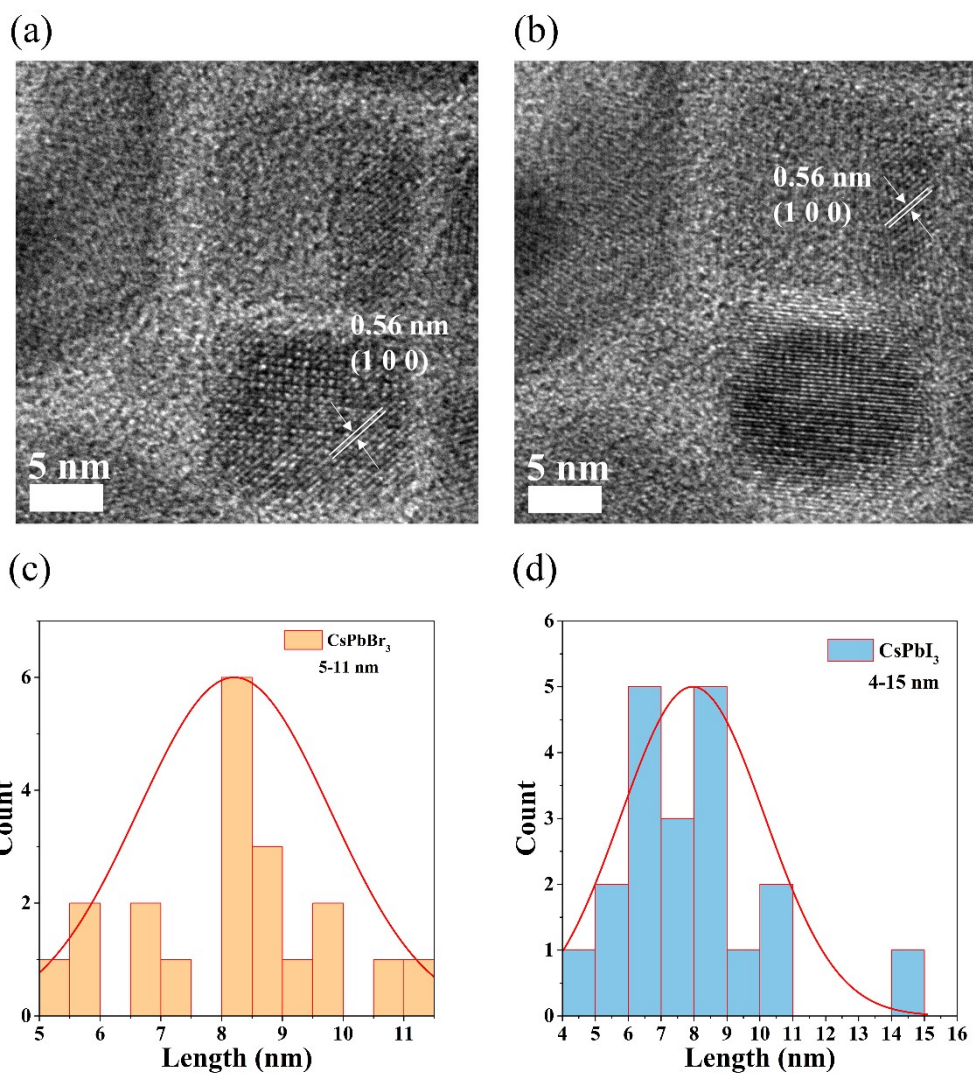

Figure S2. (a-b) HRTEM of a single CsPbBr<sub>3</sub> and CsPbI<sub>3</sub> NCs. (c-d) Size distribution histogram of CsPbBr<sub>3</sub> and CsPbI<sub>3</sub> NCs.

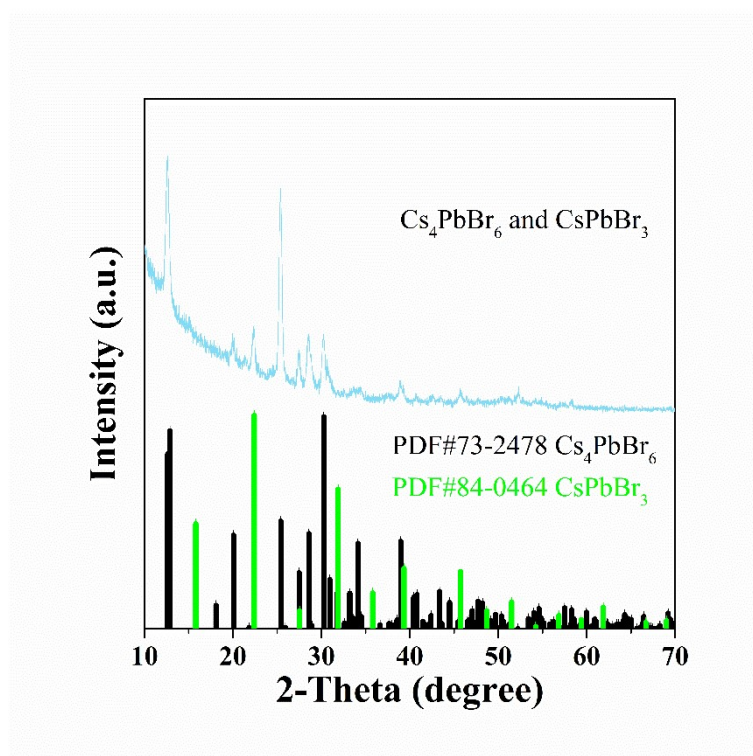

Figure S3. XRD pattern of prepared NCs with  $\text{ZnBr}_2$  solution in excess.

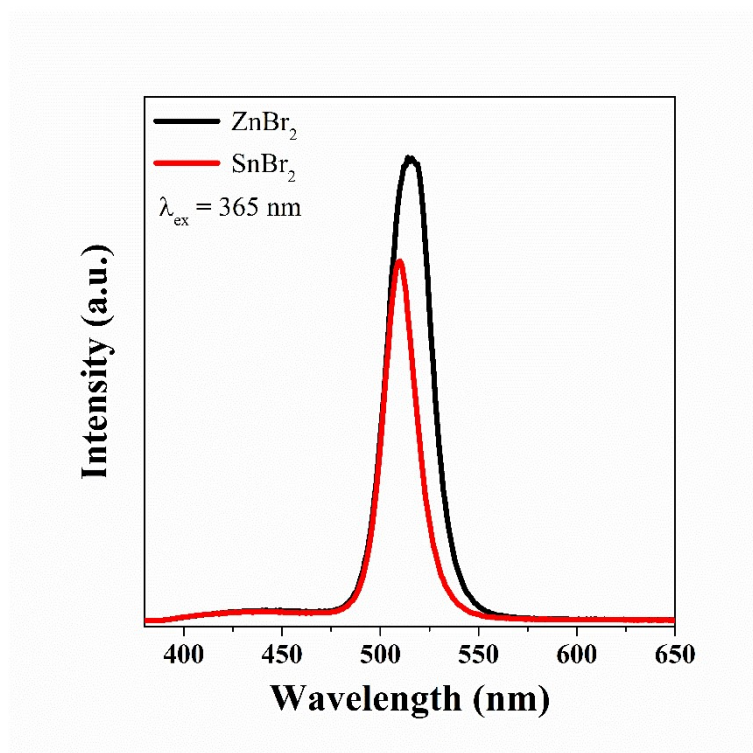

Figure S4. PL emission spectra of CsPbBr<sub>3</sub> NCs through ZnBr<sub>2</sub> and SnBr<sub>2</sub> solution triggered transformed.

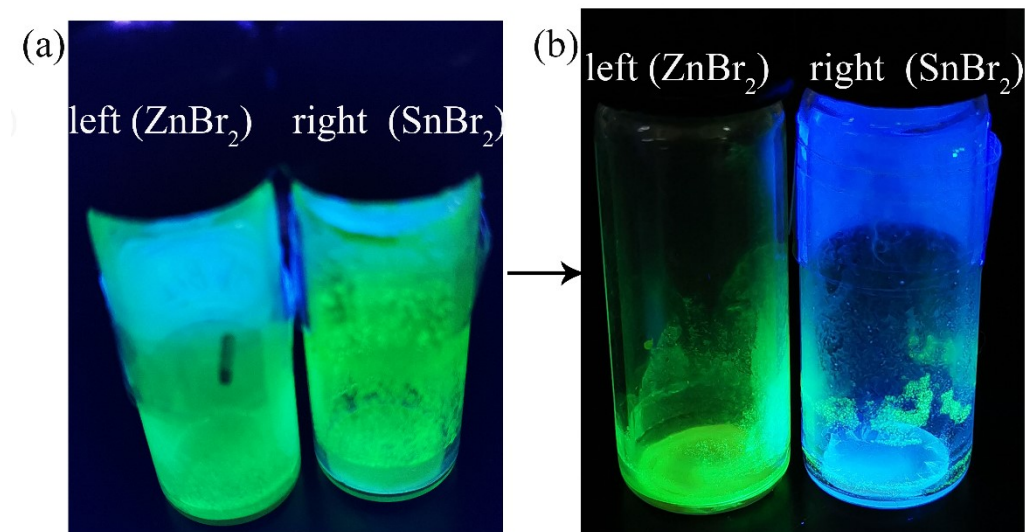

Figure S5. Photographs showing the stability of  $\text{CsPbBr}_3$  NCs obtained through (a) 100  $\mu\text{L}$  and (b) 1500  $\mu\text{L}$   $\text{ZnBr}_2$  and  $\text{SnBr}_2$  solution triggered transformed.



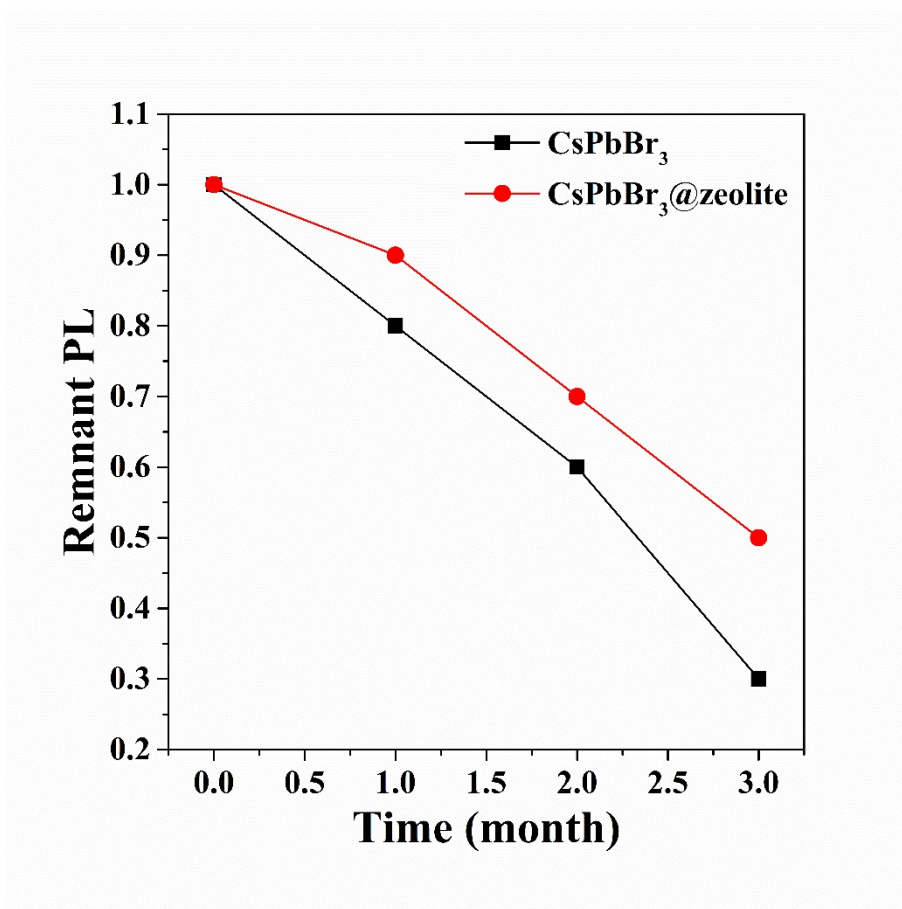

Figure S6. Remnant PL of CsPbBr<sub>3</sub> NCs and CsPbBr<sub>3</sub>@zeolite in different time.

Table S2. Comparison of specific surface area and pore size of mesoporous silicon before and after loading samples.

| sample                       | BET surface (m <sup>2</sup> /g) | Pore volume (cm <sup>3</sup> /g) | Pore size (nm) |
|------------------------------|---------------------------------|----------------------------------|----------------|
| Zeolite-Y                    | 768.8                           | 1.3                              | 5.6            |
| CsPbBr <sub>3</sub> @zeolite | 456.7                           | 0.9                              | 5.8            |

Table S3. Summary of emitting materials and PeLED Performances.

| Emitting materials           | PLQY (%) | FWHM (nm) | Luminous efficiency (lm/W) |
|------------------------------|----------|-----------|----------------------------|
| CsPbBr <sub>3</sub>          | 92       | 19        | 147.82                     |
| CsPbBr <sub>3</sub> @zeolite | 83       | 20        | 107.17                     |
| CsPbI <sub>3</sub>           | 50       | 36        | 130.56                     |
| CsPbI <sub>3</sub> @zeolite  | 46       | 37        | 103.24                     |

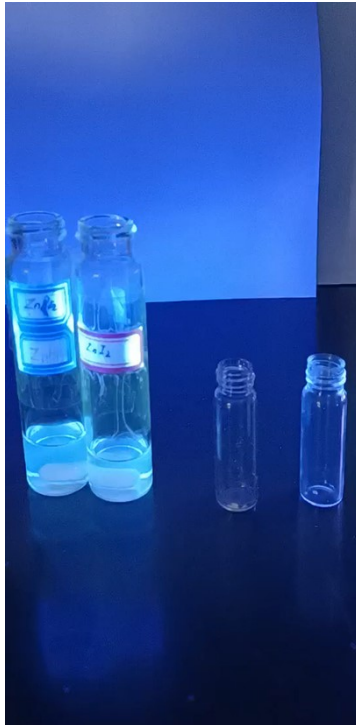

**Video S1.** More intuitive transformation process.
